# Supplementary material for: Systematic review of the effective components of psychosocial interventions delivered by care home staff to people with dementia
Source: PubMed Central journal article supplement (PMC5306506; doi:10.1136/bmjopen-2016-014177), 2017-02-09
Supplement: bmjopen-2016-014177supp_appendix1.pdf [file bmjopen-2016-014177supp_appendix1.pdf]

### **Supplementary appendix 1: Search strategy for Medline, PsychINFO and EMBASE (OVID) databases**

We searched Medline, PsychINFO and EMBASE (OVID) databases for the following search terms (in any field) with no restrictions on date of publication or language of publication:

{care home} OR {institution} OR {24 hour care} OR {residential home} OR {nursing home} OR {assisted living residence} OR {long-term care}

AND

{staff} OR {care worker\*} OR {nursing staff} OR {care staff} or {care assistant\*} OR {paid carer\*}

AND

{Intervention} OR {training} OR {Staff training} OR {staff education} OR {staff training intervention\*}

AND

{Dementia} OR {Alzheimer} OR {Vascular dementia}
